# Supplementary material for: In Vitro High-Throughput Toxicological Assessment of Nanoplastics
Source: MDPI journal article supplement (doi:10.3390/nano12121947), 2022-06-07
Supplement: s1 [file s1]

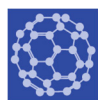

## Article

# In Vitro High-Throughput Toxicological Assessment of Nanoplastics

Valentina Tolardo <sup>1,2</sup>, Davide Magri <sup>3</sup>, Francesco Fumagalli <sup>3</sup>, Domenico Cassano <sup>3</sup>, Athanassia Athanassiou <sup>1</sup>, Despina Fragouli <sup>1</sup> and Sabrina Gioria <sup>3,\*</sup>

<sup>1</sup> Smart Materials, Istituto Italiano di Tecnologia, Via Morego, 30, 16163 Genova, Italy; valentina.tolardo@iit.it (V.T.); athanassia.athanassiou@iit.it (A.A.); despina.fragouli@iit.it (D.F.)

<sup>2</sup> Department of Informatics, Bioengineering, Robotics and Systems Engineering, University of Genova, Via All'Opera Pia, 13, 16145 Genova, Italy

<sup>3</sup> European Commission, Joint Research Centre (JRC), 21027 Ispra, Italy; davide.magri.mail@gmail.com (D.M.); francesco-sirio.fumagalli@ec.europa.eu (F.F.); domenico.cassano@sns.it (D.C.)

\* Correspondence: sabrina.gioria@ec.europa.eu

## Supplementary

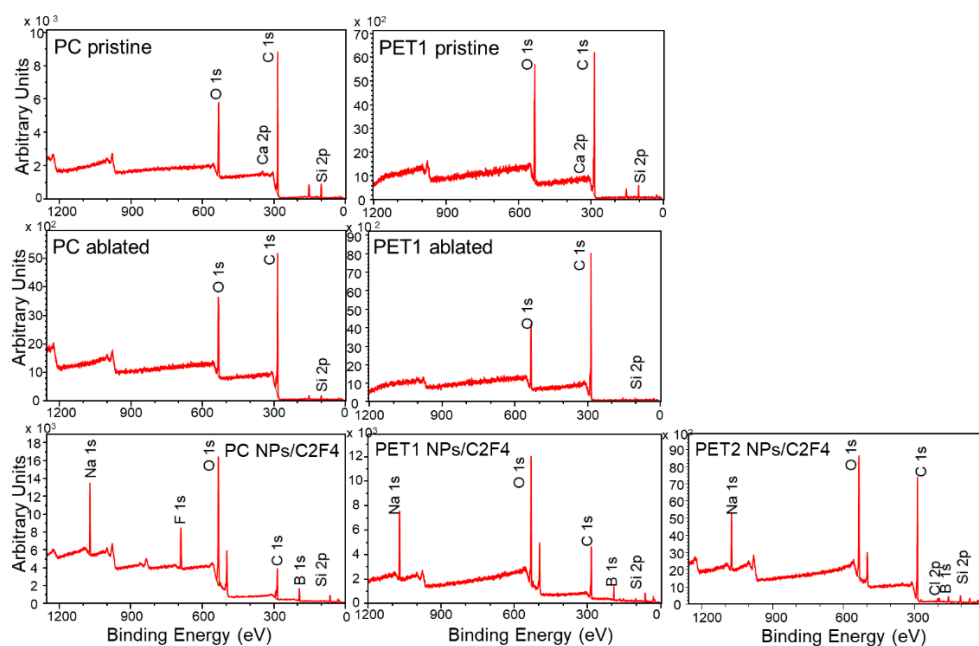

**Figure S1.** Survey XPS spectra of the pristine polymer and of the as-synthesized NPs with the respective elemental composition.

**Table S1.** Percentage of the respective elemental composition of survey spectra.

|              | <b>Binding Energy</b> | <b>PC pristine</b>       | <b>PC ablated</b>   | <b>PC NPs/C2F4</b>   |
|--------------|-----------------------|--------------------------|---------------------|----------------------|
| <b>C 1s</b>  | 284.7 eV              | 78.60%                   | 81.44%              | 29.66%               |
| <b>O 1s</b>  | 532.2 eV              | 16.17%                   | 16.65%              | 45.37%               |
| <b>Si 2p</b> | 102.2 eV              | 5.22%                    | 1.91%               | 0.40%                |
| <b>B 1s</b>  | 192.7 eV              |                          |                     | 14.52%               |
| <b>Ca 2p</b> | 347.3 eV              | 0.31%                    |                     |                      |
| <b>F 1s</b>  | 689.7 eV              |                          |                     | 8.9%                 |
| <b>Na 1s</b> | 1071.16 eV            |                          |                     | 10.05%               |
|              | <b>Binding Energy</b> | <b>PET1<br/>pristine</b> | <b>PET1 ablated</b> | <b>PET1 NPs/C2F4</b> |
| <b>C 1s</b>  | 284.7 eV              | 74.64%                   | 81.55%              | 57.59%               |
| <b>O 1s</b>  | 532.2 eV              | 23.39%                   | 16.29%              | 33.72%               |
| <b>Si 2p</b> | 102.2 eV              | 1.86%                    | 2.17%               | 2.87%                |
| <b>B 1s</b>  | 192.7 eV              |                          |                     | 10.39%               |
| <b>Ca 2p</b> |                       | 0.12%                    |                     |                      |
| <b>Na 1s</b> | 1071.16 eV            |                          |                     | 3.49%                |
|              | <b>Binding Energy</b> |                          |                     | <b>PET2 NPs/C2F4</b> |
| <b>C 1s</b>  | 284.7 eV              |                          |                     | 66.71%               |
| <b>O 1s</b>  | 532.2 eV              |                          |                     | 20.70%               |
| <b>Si 2p</b> | 102.2 eV              |                          |                     | 3.29%                |
| <b>B 1s</b>  | 192.7 eV              |                          |                     | 2.94%                |
| <b>Cl 2p</b> | 197.8 eV              |                          |                     | 0.75%                |
| <b>Na 1s</b> | 1071.16 eV            |                          |                     | 5.61%                |

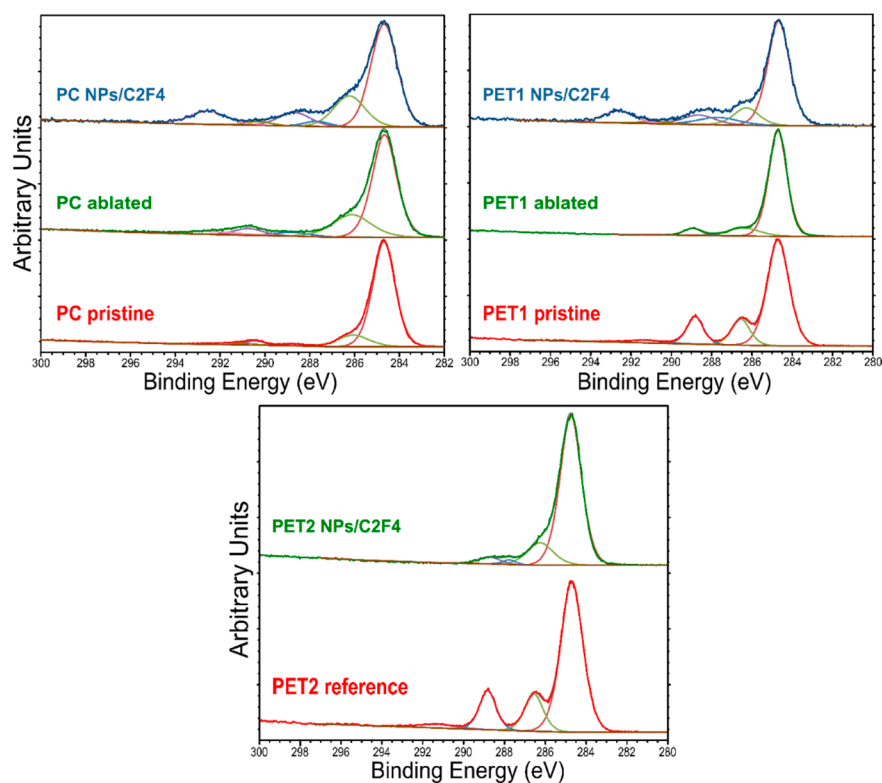

**Figure S2.** XPS C1s high resolution spectra of the pristine polymer and of the as-synthesized NPs with the corresponding deconvolutions.

**Table S2.** Percentage of corresponding deconvolutions results of C1s spectra.

| C 1s            | Binding Energy | PC pristine   | PC ablated   | PC NPs/C2F4   |
|-----------------|----------------|---------------|--------------|---------------|
| C-C (ar)        | 284.6 eV       | 60.93%        | 48.07%       | 58.38%        |
| C-C (al)        | 285.1 eV       | 22.53%        | 17.77%       |               |
| C-O-C, C-OH     | 286.3 eV       | 8.67%         | 19.22%       | 17.79%        |
| C=O             | 287.7 eV       |               |              | 3.27%         |
| O=C-O           | 288.7 eV       | 1.87%         | 4.01%        | 8.02%         |
| O=C(-O)2        | 290.4 eV       | 2.61%         | 3.73%        | 2.02%         |
| C-C sh.-up (I)  | 291.3 eV       | 2.17%         | 2.27%        |               |
| C-C sh.-up (II) | 292.5 eV       | 1.23%         | 4.94%        |               |
| C-F2            | 292.5 eV       |               |              | 10.52%        |
| C 1s            | Binding Energy | PET1 pristine | PET1 ablated | PET1 NPs/C2F4 |
| C-C (ar)        | 284.6 eV       | 37.31%        | 78.08%       | 58.92%        |
| C-C (al)        | 285.1 eV       | 24.62%        |              |               |
| C-O-C, C-OH     | 286.3 eV       | 15.68%        | 13.50%       | 16.82%        |
| C=O             | 287.7 eV       |               |              | 3.96%         |
| O=C-O           | 288.7 eV       | 15.42%        | 6.31%        | 10.92%        |
| C-C sh.-up (I)  | 291.3 eV       | 5.54%         | 1.52%        | 2.84%         |

|                 |                       |                       |       |                      |
|-----------------|-----------------------|-----------------------|-------|----------------------|
| C-C sh.-up (II) | 292.5 eV              | 1.43%                 | 0.60% |                      |
| <b>C 1s</b>     | <b>Binding Energy</b> | <b>PET2 reference</b> |       | <b>PET2 NPs/C2F4</b> |
| C-C (ar)        | 284.6 eV              | 37.31%                |       | 82.94%               |
| C-C (al)        | 285.1 eV              | 24.62%                |       |                      |
| C-O-C, C-OH     | 286.3 eV              | 15.68%                |       | 12.81%               |
| C=O             | 287.7 eV              |                       |       |                      |
| O=C-O           | 288.7 eV              | 15.42%                |       | 4.25%                |
| C-C sh.-up (I)  | 291.3 eV              | 5.54%                 |       |                      |
| C-C sh.-up (II) | 292.5 eV              | 1.43%                 |       |                      |

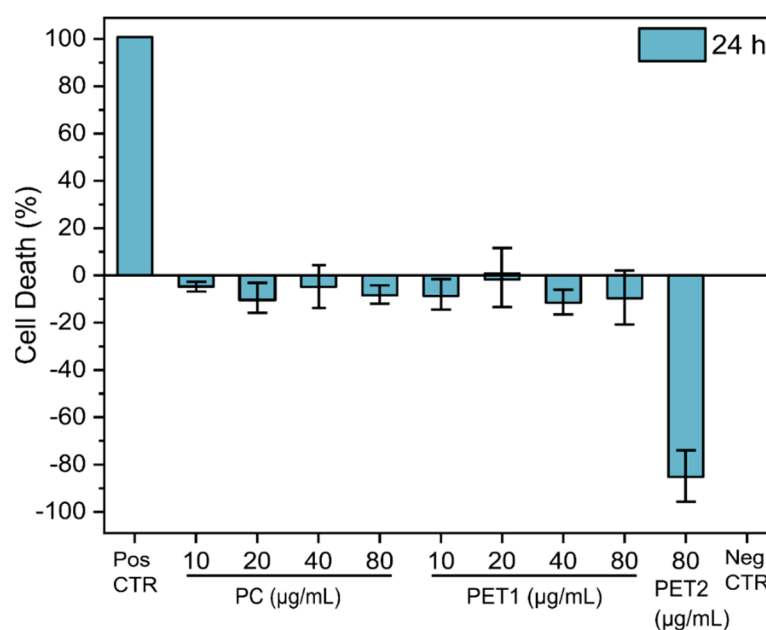

**Figure S3.** HepG2 cell viability after exposure to NPs at the concentration of 10, 20, 40, 80 µg/mL for 24 or 48 h. In the case of PET2, data are represented only at 80 µg/mL (LDH assay). Data are reported as % of cell death (average of three independent experiments  $\pm$  SD).

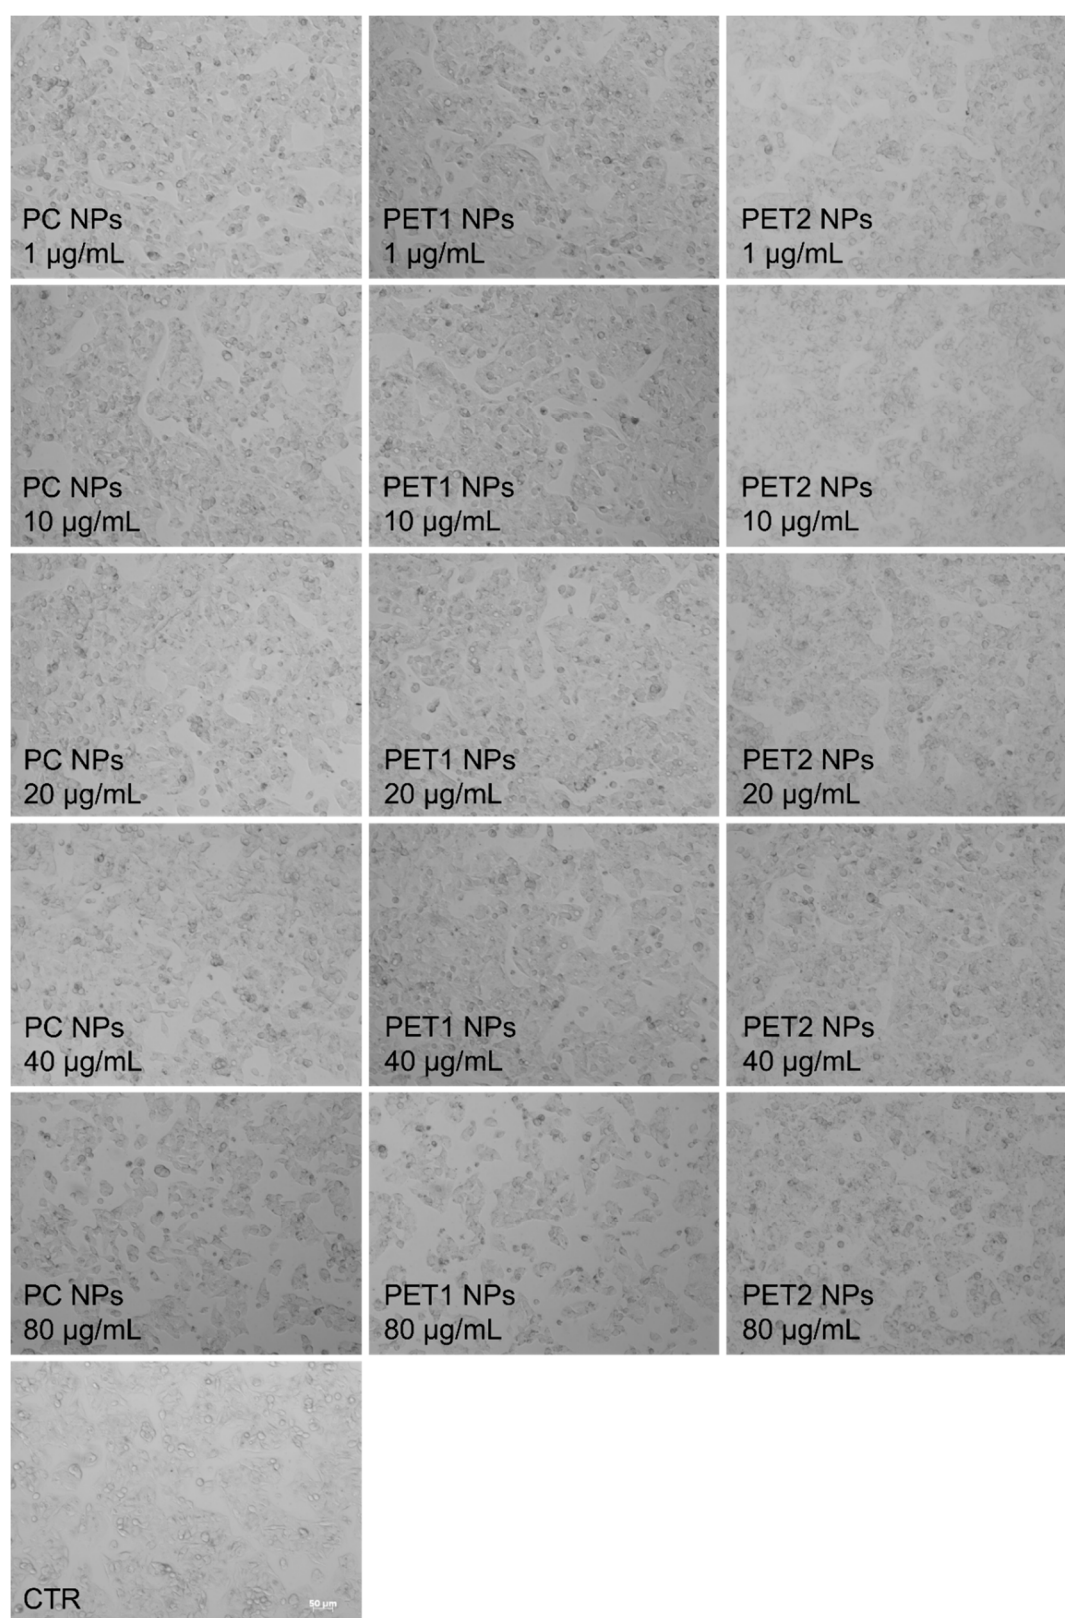

**Figure S4.** Representative morphological images of HePG2 cells after different treatments for 24 h. Scale bar at 50 µm for all images.

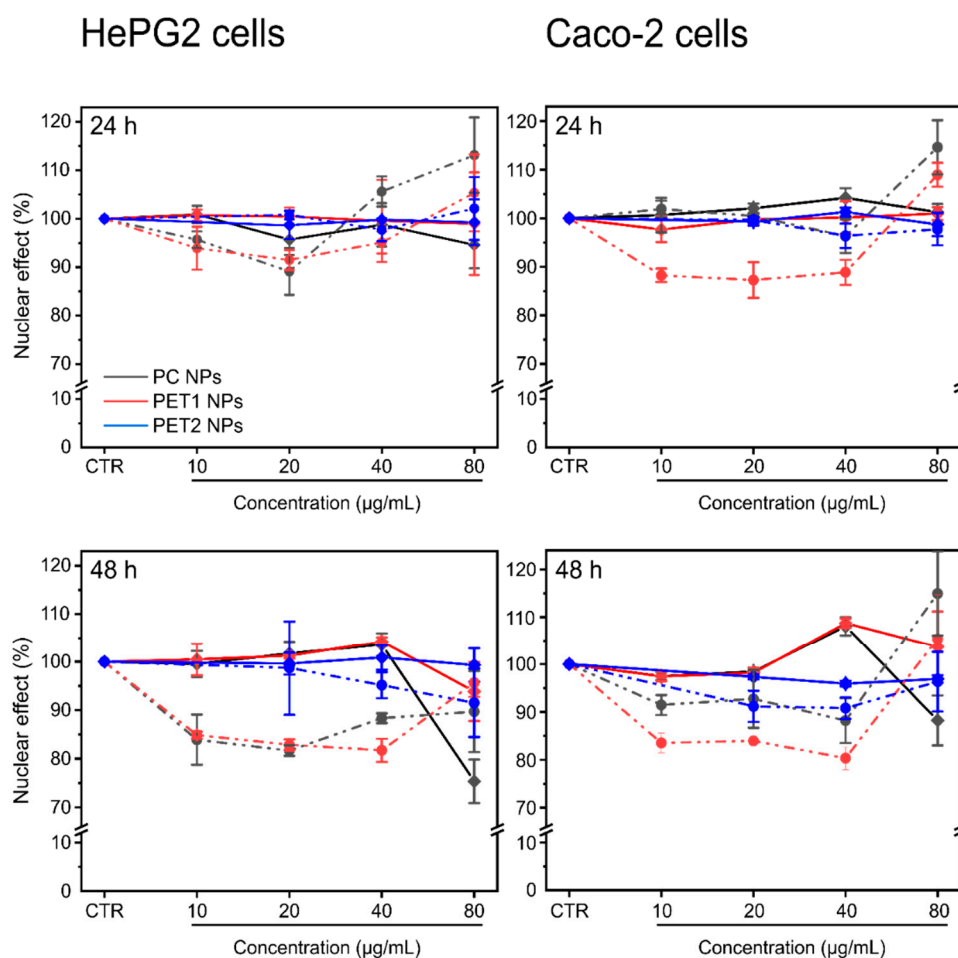

**Figure S5.** NPs effects on HePG2 or Caco-2 cells on nuclear size (line) and nuclear intensity (dash dot). Cells were exposed to PC, PET1 or PET2 NPs at concentrations between 10 and 80 µg/mL for 24 or 48 h, stained with Hoechst 33342 and analyzed by HCL. Data are expressed as % nuclear effect normalized to the control (untreated cells) and reported as mean of three independent experiments  $\pm$  SD.
